# Supplementary material
Source: HighWire-hosted journal article supplement (https://drc.bmj.com/content/9/1/e001731)
Supplement: inline-supplementary-material-4 [file inline-supplementary-material-4.pdf]

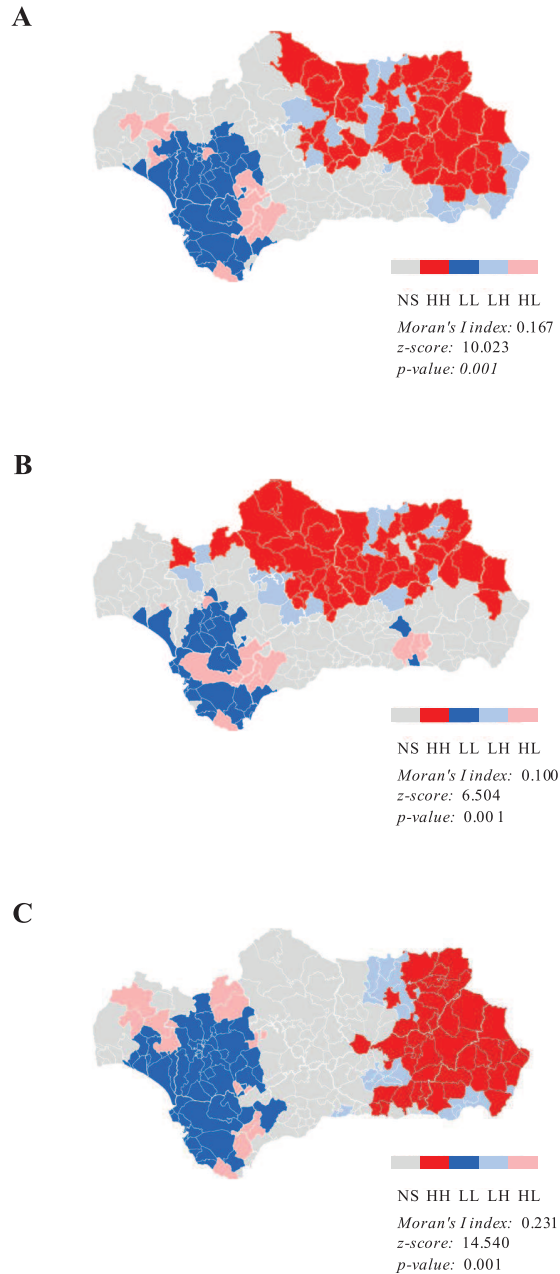

**Supplemental Figure 2.** Geographical distribution of age in the overall population (A), women (B) and men (C). It could not be obtained in individuals aged <16 years, aged 16-64 years and aged >64 years. HH, high-high cluster; HL, high-low cluster; LH, low-high cluster; LL, low-low cluster; NS, non-significant.
