# Supplementary material
Source: HighWire-hosted journal article supplement (https://drc.bmj.com/content/9/1/e001731)
Supplement: inline-supplementary-material-9 [file inline-supplementary-material-9.pdf]

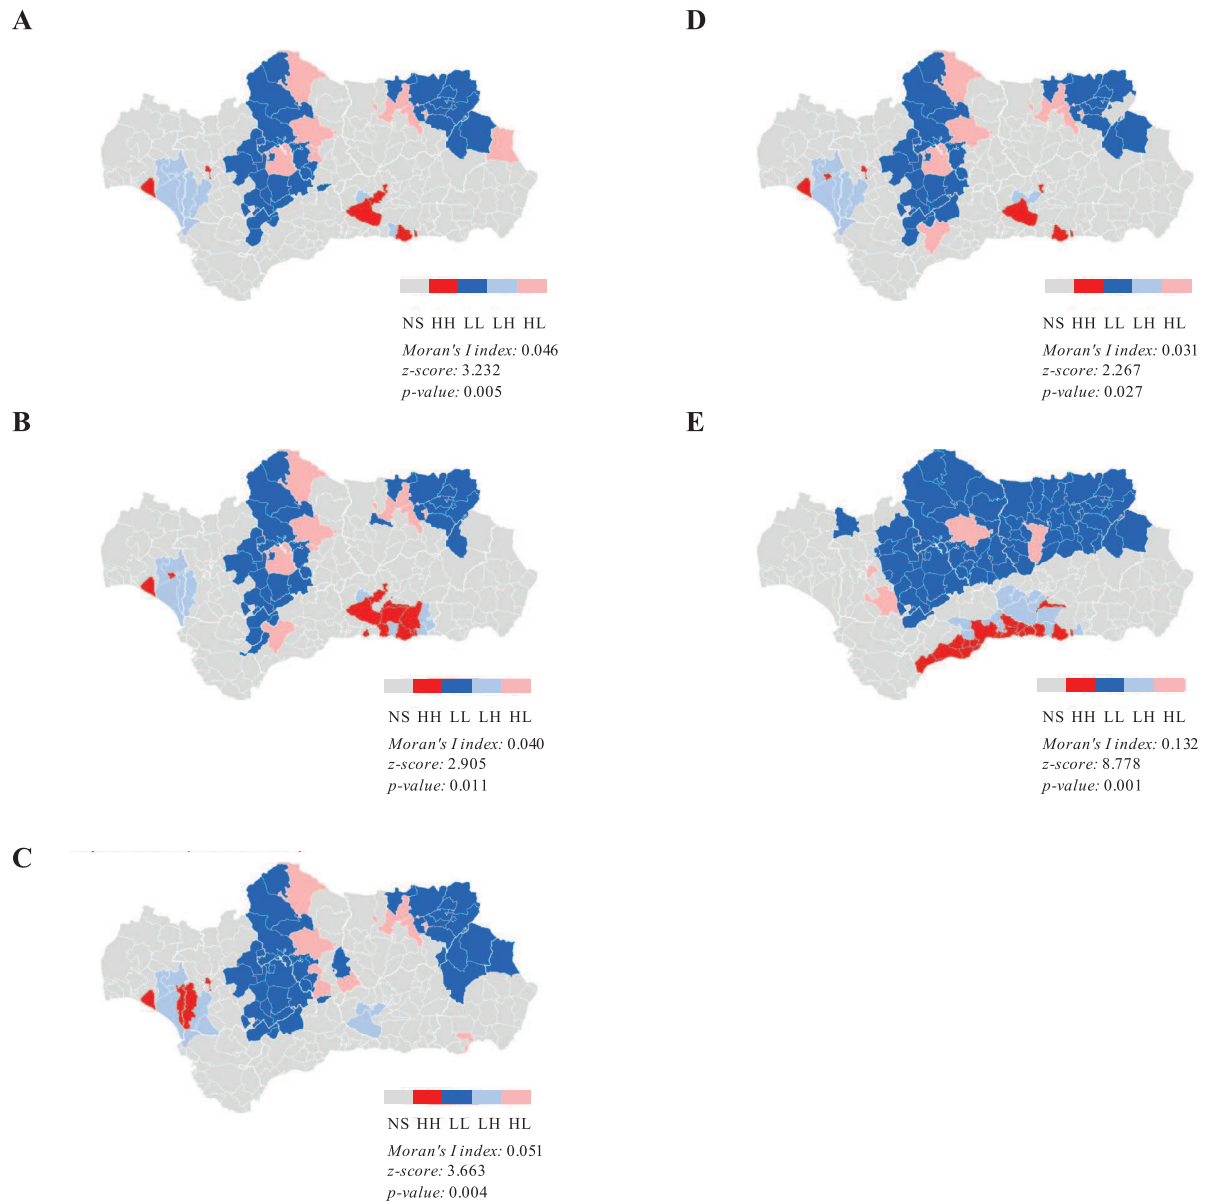

**Supplemental Figure 7.** Geographical distribution of individuals with tertiary studies per 100,000 inhabitants in the overall population (A), women (B), men (C), aged 16-64 years (D) and aged >64 years (E). It could not be obtained in individuals aged <16 years. HH, high-high cluster; HL, high-low cluster; LH, low-high cluster; LL, low-low cluster; NS, non-significant.
