# Supplementary material
Source: HighWire-hosted journal article supplement (https://drc.bmj.com/content/9/1/e001731)
Supplement: inline-supplementary-material-14 [file inline-supplementary-material-14.pdf]

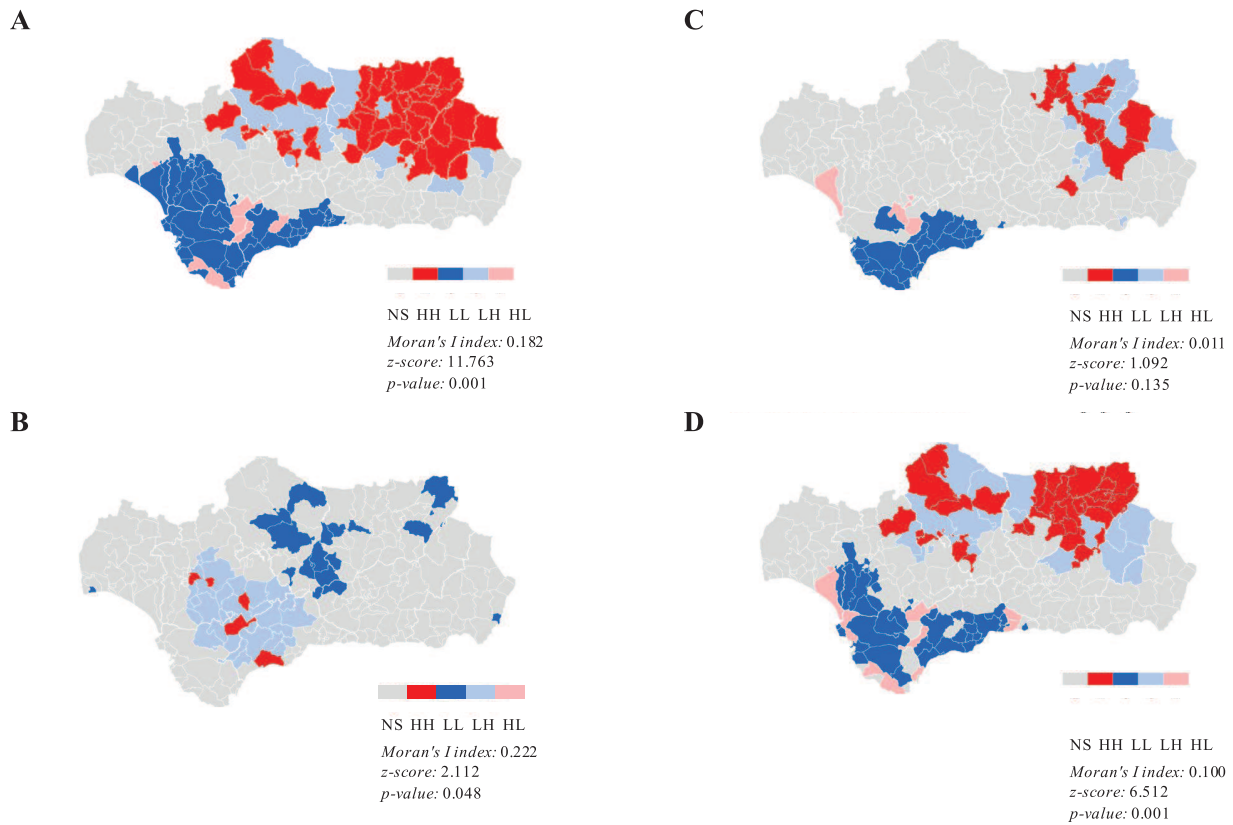

**Supplemental Figure 12.** Geographical distribution of deaths from endocrine disease per 100,000 inhabitants in the overall population (A), <16 years (B), aged 16-64 years (C) and aged >64 years (D). It could not be obtained according to gender. HH, high-high cluster; HL, high-low cluster; LH, low-high cluster; LL, low-low cluster; NS, non-significant.
