# Supplementary material
Source: HighWire-hosted journal article supplement (https://drc.bmj.com/content/9/1/e001731)
Supplement: inline-supplementary-material-15 [file inline-supplementary-material-15.pdf]

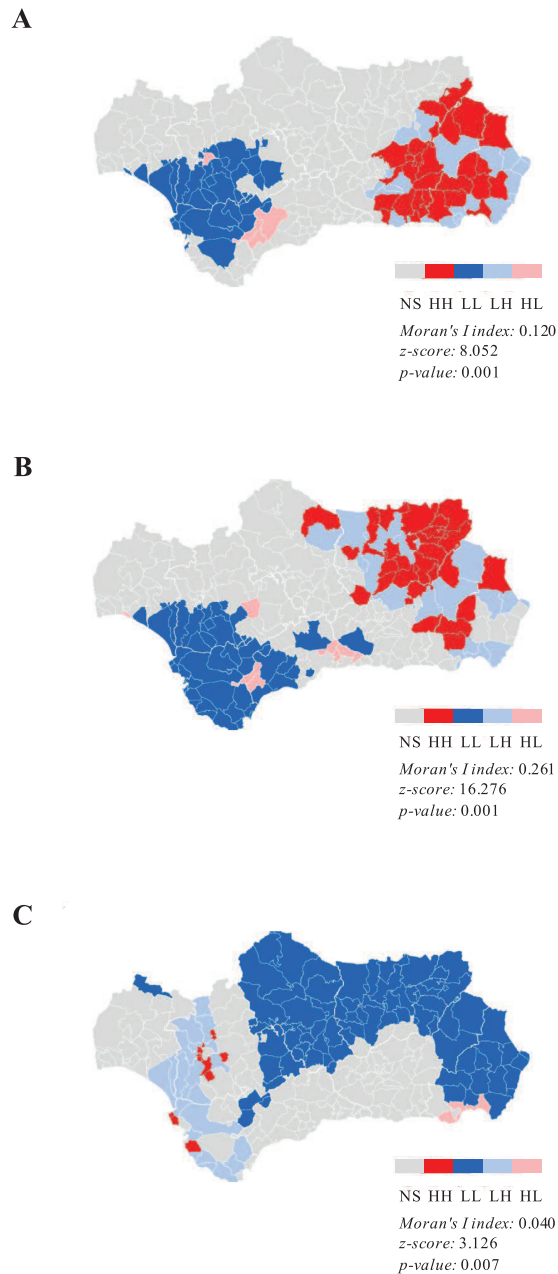

**Supplemental Figure 13.** Geographical distribution of pharmacies per 100,000 inhabitants (A), sports facilities per 100,000 inhabitants (B) and inhabitants per hectare (C) in the overall population. They could not be obtained according to gender and age ranges. HH, high-high cluster; HL, high-low cluster; LH, low-high cluster; LL, low-low cluster; NS, non-significant.
